# Supplementary material
Source: publisher figshare collection journal article supplement (https://gsajournals.figshare.com/ndownloader/files/13323857)
Supplement: Supplementary file 1 [file 13323857]

## Sheet: Radka_rsms_ReTL_257_20130710__p
Chromosome	Position	p-value	MAF	MAC
1	657	0.369267	0.210117	54
1	3102	0.428303	0.256809	66
1	4648	0.287143	0.225681	58
1	4880	0.815237	0.0894942	23
1	5975	0.216431	0.0466926	12
1	6063	0.124283	0.354086	91
1	6449	0.508198	0.124514	32
1	6514	0.871238	0.311284	80
1	6603	0.1663	0.217899	56
1	6768	0.575719	0.0894942	23
1	7601	1	0.0233463	6
1	8193	0.214048	0.210117	54
1	8617	0.483799	0.0311284	8
1	10219	0.852151	0.0466926	12
1	10449	1	0.0233463	6
1	10969	0.567165	0.077821	20
1	11493	0.294516	0.29572	76
1	11696	1	0.0233463	6
1	12584	0.0745031	0.470817	121
1	12659	0.929094	0.0389105	10
1	13045	0.0841185	0.116732	30
1	14385	0.36259	0.0350195	9
1	19819	0.834953	0.0583658	15
1	20892	0.528859	0.0311284	8
1	21043	0.152776	0.350195	90
1	21128	0.823656	0.431907	111
1	21829	0.399354	0.490272	126
1	22522	0.974758	0.435798	112
1	23838	0.66337	0.0155642	4
1	25315	0.847567	0.0194553	5
1	25365	0.410971	0.0116732	3
1	25773	0.284601	0.108949	28
1	26288	0.716929	0.0272374	7
1	27265	0.381685	0.217899	56
1	28948	0.371404	0.0311284	8
1	28978	0.770917	0.105058	27
1	29291	0.227798	0.14786	38
1	30529	0.66337	0.0155642	4
1	30683	0.639469	0.0194553	5
1	31515	0.0424722	0.381323	98
1	31926	0.90802	0.0233463	6
1	32210	0.267561	0.0700389	18
1	32807	0.218933	0.373541	96
1	34125	0.66337	0.0155642	4
1	34599	0.733594	0.0817121	21
1	35856	0.0586238	0.225681	58
1	37072	0.079654	0.447471	115
1	38946	0.439909	0.0311284	8
1	39751	0.839627	0.428016	110
1	41178	0.0609869	0.381323	98
1	41427	0.0643461	0.381323	98
1	44567	0.291202	0.455253	117
1	45075	0.363178	0.0389105	10
1	45580	0.528859	0.0311284	8
1	45683	0.295827	0.0428016	11
1	46373	0.10853	0.354086	91
1	46499	0.10649	0.210117	54
1	46912	0.238911	0.155642	40
1	47577	0.471712	0.342412	88
1	47692	0.625377	0.0583658	15
1	48118	0.362923	0.214008	55
1	48181	0.257755	0.48249	124
1	49080	1	0.291829	75
1	51392	0.720898	0.0350195	9
1	51706	0.386144	0.377432	97
1	51878	0.66337	0.0155642	4
1	52202	0.599158	0.264591	68
1	53183	0.319809	0.0389105	10
1	53729	0.353286	0.0311284	8
1	53901	0.665476	0.214008	55
1	55684	0.886882	0.466926	120
1	57136	0.0600712	0.194553	50
1	57686	0.435705	0.182879	47
1	59637	0.0262433	0.140078	36
1	60083	0.702909	0.167315	43
1	60772	0.860298	0.490272	126
1	61122	0.836955	0.0389105	10
1	61266	0.721853	0.0155642	4
1	61405	0.51774	0.07393	19
1	61661	0.975143	0.206226	53
1	62259	0.798933	0.07393	19
1	62935	0.844448	0.0233463	6
1	63084	0.287529	0.357977	92
1	63645	0.41282	0.435798	112
1	63759	0.567291	0.420233	108
1	63915	0.326551	0.490272	126
1	64149	0.653471	0.319066	82
1	64651	0.360003	0.0233463	6
1	68340	0.0593605	0.0856031	22
1	68880	0.506997	0.307393	79
1	69311	0.0643368	0.256809	66
1	70933	0.0818116	0.280156	72
1	71326	1	0.29572	76
1	71348	0.845602	0.18677	48
1	71868	0.310455	0.381323	98
1	72138	0.66337	0.0155642	4
1	72756	0.107853	0.284047	73
1	72894	0.146353	0.264591	68
1	72924	0.66337	0.0155642	4
1	73047	0.107853	0.284047	73
1	73467	0.993785	0.0817121	21
1	73691	0.500737	0.0350195	9
1	73851	0.0580211	0.202335	52
1	73989	0.0580211	0.202335	52
1	74169	0.12671	0.29572	76
1	74707	0.66337	0.0155642	4
1	75481	0.634722	0.0505837	13
1	75721	0.822758	0.0544747	14
1	75899	0.168992	0.36965	95
1	76188	0.723293	0.077821	20
1	76217	0.178058	0.229572	59
1	76847	0.585237	0.175097	45
1	76879	0.0788609	0.498054	128
1	76906	0.274864	0.159533	41
1	77127	0.628272	0.214008	55
1	77140	0.0184305	0.198444	51
1	77243	0.00381086	0.175097	45
1	77458	0.790262	0.330739	85
1	78803	0.965968	0.396887	102
1	78975	0.581294	0.412451	106
1	79418	0.0582461	0.474708	122
1	80216	0.109832	0.44358	114
1	80374	0.193738	0.311284	80
1	80400	0.123085	0.249027	64
1	81068	0.937911	0.0466926	12
1	81496	0.0310558	0.241245	62
1	81854	0.499438	0.350195	90
1	81869	0.582804	0.287938	74
1	82197	0.47939	0.07393	19
1	82290	0.719283	0.07393	19
1	83117	0.995605	0.14786	38
1	83177	0.56194	0.136187	35
1	83219	0.770162	0.0272374	7
1	84144	0.607741	0.0428016	11
1	84379	0.806635	0.0583658	15
1	84558	0.631355	0.101167	26
1	85561	0.0118788	0.2607	67
1	85860	0.314938	0.0272374	7
1	86656	0.512722	0.48249	124
1	87060	0.496985	0.11284	29
1	87791	0.48484	0.486381	125
1	87985	0.589409	0.0194553	5
1	88300	0.751602	0.354086	91
1	88658	0.614829	0.241245	62
1	89312	0.146327	0.36965	95
1	90606	0.523371	0.237354	61
1	92353	0.231695	0.303502	78
1	92866	0.0896824	0.0466926	12
1	93562	0.634154	0.0233463	6
1	93740	0.66337	0.0155642	4
1	93800	0.513169	0.140078	36
1	95018	0.66337	0.0155642	4
1	95225	0.357647	0.48249	124
1	95386	0.277094	0.151751	39
1	95749	0.55849	0.0894942	23
1	96521	0.86125	0.155642	40
1	96726	0.66337	0.0155642	4
1	96770	0.377253	0.0622568	16
1	97473	0.380212	0.2607	67
1	98317	0.231695	0.303502	78
1	98617	0.24251	0.151751	39
1	99001	0.113192	0.346304	89
1	99456	0.407899	0.435798	112
1	99757	0.193301	0.159533	41
1	99785	0.496449	0.40856	105
1	99805	0.843003	0.389105	100
1	100267	0.116429	0.381323	98
1	100314	0.116429	0.381323	98
1	100501	0.237354	0.400778	103
1	100832	0.0189775	0.33463	86
1	103175	0.325755	0.206226	53
1	103453	0.147179	0.217899	56
1	103654	0.0803935	0.128405	33
1	103749	0.0766901	0.124514	32
1	103963	0.937757	0.0622568	16
1	105029	0.636181	0.0350195	9
1	105064	0.11811	0.229572	59
1	105282	0.593328	0.155642	40
1	105894	0.886043	0.252918	65
1	107585	0.550082	0.07393	19
1	109472	0.128297	0.319066	82
1	109627	0.131993	0.420233	108
1	112907	0.103973	0.439689	113
1	113076	0.695615	0.105058	27
1	114187	0.843664	0.225681	58
1	114648	0.156871	0.287938	74
1	114737	0.701234	0.2607	67
1	114915	0.963772	0.182879	47
1	115320	0.772517	0.178988	46
1	117199	0.112125	0.350195	90
1	117379	0.353345	0.463035	119
1	118192	0.584856	0.245136	63
1	118441	0.170901	0.315175	81
1	119003	0.523124	0.171206	44
1	120328	0.22962	0.459144	118
1	120376	0.864704	0.256809	66
1	120456	0.0489285	0.233463	60
1	120787	0.485003	0.194553	50
1	122005	0.380568	0.0933852	24
1	122503	0.390599	0.217899	56
1	122809	0.954991	0.136187	35
1	123313	0.349255	0.217899	56
1	123924	0.401076	0.18677	48
1	125155	0.495688	0.214008	55
1	126251	0.82176	0.163424	42
1	127093	0.876047	0.307393	79
1	127891	0.596705	0.198444	51
1	128116	0.738476	0.350195	90
1	128366	0.875511	0.361868	93
1	129025	0.391544	0.171206	44
1	131281	0.505889	0.36965	95
1	132276	0.855378	0.451362	116
1	132773	0.918044	0.451362	116
1	132898	0.529095	0.0817121	21
1	133144	0.581313	0.07393	19
1	133186	0.263199	0.11284	29
1	133607	0.871385	0.435798	112
1	133626	0.328289	0.108949	28
1	133701	0.242359	0.11284	29
1	134063	0.418366	0.11284	29
1	135519	0.355355	0.2607	67
1	136188	0.879705	0.431907	111
1	136211	0.375032	0.428016	110
1	136399	0.787602	0.0894942	23
1	136467	0.927487	0.404669	104
1	136773	0.453426	0.44358	114
1	137104	0.404083	0.2607	67
1	137134	0.288768	0.233463	60
1	137545	0.706863	0.377432	97
1	138060	0.929638	0.190661	49
1	138335	0.809196	0.276265	71
1	138627	0.706294	0.128405	33
1	138875	0.805011	0.44358	114
1	138989	0.806731	0.105058	27
1	139393	0.530184	0.455253	117
1	139832	0.903354	0.361868	93
1	139991	0.986103	0.354086	91
1	140005	0.986103	0.354086	91
1	140671	0.781715	0.431907	111
1	141411	0.939799	0.124514	32
1	141556	0.849998	0.400778	103
1	142940	0.174001	0.319066	82
1	143199	0.900623	0.101167	26
1	143272	0.783573	0.0972763	25
1	143471	0.642166	0.428016	110
1	143509	0.523263	0.40856	105
1	143704	0.796648	0.447471	115
1	144331	0.519763	0.0155642	4
1	144392	0.519763	0.0155642	4
1	144410	0.584189	0.412451	106
1	144832	0.660479	0.416342	107
1	144872	0.983557	0.136187	35
1	145457	0.867035	0.431907	111
1	146220	0.449632	0.412451	106
1	147220	0.69957	0.0155642	4
1	147236	0.556063	0.0311284	8
1	148601	0.241586	0.459144	118
1	148990	0.295233	0.0350195	9
1	150430	0.353548	0.470817	121
1	150457	0.592074	0.490272	126
1	150992	0.315677	0.451362	116
1	151942	0.283132	0.07393	19
1	153104	0.801107	0.14786	38
1	153232	0.0289726	0.217899	56
1	155442	0.913492	0.0272374	7
1	155984	0.127498	0.140078	36
1	156619	0.0326711	0.140078	36
1	157491	0.259219	0.202335	52
1	157974	0.623253	0.11284	29
1	158134	0.491348	0.0116732	3
1	158305	0.151564	0.404669	104
1	158640	0.0649912	0.280156	72
1	158910	0.860095	0.178988	46
1	163082	0.0230751	0.140078	36
1	163492	0.602504	0.214008	55
1	163569	0.0420829	0.365759	94
1	163766	0.49951	0.0972763	25
1	164085	0.00737853	0.171206	44
1	164310	0.0230751	0.140078	36
1	164375	0.228634	0.268482	69
1	164393	0.53031	0.132296	34
1	164553	0.559606	0.07393	19
1	164679	0.0245754	0.136187	35
1	164815	0.0230751	0.140078	36
1	164969	0.0490174	0.159533	41
1	165386	0.859825	0.0544747	14
1	165397	0.0290468	0.00389105	1
1	165625	0.661883	0.105058	27
1	165984	0.0230751	0.140078	36
1	166030	0.519763	0.225681	58
1	166386	0.75113	0.136187	35
1	166850	0.301216	0.245136	63
1	167493	0.0470276	0.171206	44
1	167692	0.34586	0.175097	45
1	169429	0.846397	0.463035	119
1	169883	0.0516139	0.2607	67
1	170066	0.831468	0.0700389	18
1	170122	0.397263	0.077821	20
1	170319	0.914719	0.101167	26
1	171538	0.919699	0.264591	68
1	171664	0.630055	0.287938	74
1	171736	0.984777	0.498054	128
1	172182	0.825467	0.124514	32
1	173042	0.221004	0.439689	113
1	173373	0.685923	0.0233463	6
1	173531	0.830637	0.116732	30
1	173644	0.868757	0.0350195	9
1	173963	0.968623	0.249027	64
1	174791	0.509433	0.163424	42
1	174829	0.756084	0.14786	38
1	175125	0.841276	0.155642	40
1	175723	0.703115	0.136187	35
1	176636	0.836323	0.151751	39
1	177232	0.221027	0.420233	108
1	177611	0.363002	0.217899	56
1	178094	0.869336	0.167315	43
1	178636	0.815187	0.159533	41
1	179209	0.705965	0.163424	42
1	179332	0.146774	0.0661479	17
1	179597	0.951092	0.105058	27
1	179753	0.0353541	0.29572	76
1	180123	0.298316	0.07393	19
1	180336	0.444211	0.18677	48
1	181466	0.156734	0.151751	39
1	182057	0.101731	0.435798	112
1	182696	0.0162603	0.0856031	22
1	183655	0.0577918	0.217899	56
1	183690	0.399826	0.108949	28
1	183848	0.0457375	0.357977	92
1	184074	0.557343	0.0505837	13
1	184847	0.109073	0.264591	68
1	185264	0.66801	0.0583658	15
1	185783	0.461767	0.494163	127
1	190481	0.165573	0.128405	33
1	192020	0.0305377	0.128405	33
1	192523	0.556201	0.498054	128
1	197163	0.152842	0.155642	40
1	197462	0.160631	0.159533	41
1	197480	0.0958962	0.163424	42
1	197787	0.315445	0.490272	126
1	197963	0.315445	0.490272	126
1	198087	0.821917	0.11284	29
1	198236	0.845969	0.136187	35
1	198692	0.83875	0.101167	26
1	198923	0.877434	0.120623	31
1	199485	0.204384	0.2607	67
1	199514	0.813084	0.0700389	18
1	200612	0.0347573	0.159533	41
1	201086	0.539728	0.124514	32
1	201161	0.567866	0.105058	27
1	201650	0.0195784	0.264591	68
1	201754	0.969244	0.0894942	23
1	202392	0.231381	0.182879	47
1	203023	0.964308	0.0856031	22
1	203108	0.281166	0.132296	34
1	205622	0.601028	0.0817121	21
1	205710	0.351041	0.431907	111
1	205871	0.655255	0.0350195	9
1	207062	0.730263	0.0466926	12
1	207099	0.422362	0.0933852	24
1	207154	0.692965	0.116732	30
1	207187	0.144346	0.48249	124
1	207938	0.962982	0.0544747	14
1	208251	0.00241098	0.416342	107
1	208851	0.00541345	0.33463	86
1	208903	0.0543175	0.466926	120
1	210424	0.253629	0.105058	27
1	210823	0.266074	0.431907	111
1	211861	0.396259	0.0817121	21
1	212440	0.243041	0.124514	32
1	214841	0.539597	0.0428016	11
1	215174	0.056326	0.428016	110
1	215591	0.842048	0.0661479	17
1	216233	0.548715	0.0661479	17
1	216654	0.80606	0.07393	19
1	219412	0.848995	0.0622568	16
1	219840	0.441176	0.077821	20
1	220127	0.461817	0.0505837	13
1	220860	0.765028	0.280156	72
1	221441	0.781463	0.143969	37
1	221965	0.278091	0.0428016	11
1	222616	0.24822	0.299611	77
1	222932	0.590709	0.0466926	12
1	223037	0.387304	0.291829	75
1	223306	0.0181868	0.322957	83
1	223623	0.660179	0.2607	67
1	223752	0.636867	0.412451	106
1	223800	0.700152	0.459144	118
1	225129	0.304124	0.439689	113
1	225675	0.272254	0.0894942	23
1	225936	0.802087	0.159533	41
1	226046	0.793897	0.159533	41
1	228318	0.460119	0.116732	30
1	228432	0.362354	0.210117	54
1	229618	0.774129	0.357977	92
1	232666	0.834839	0.233463	60
1	233534	0.105034	0.400778	103
1	234710	0.773039	0.268482	69
1	235122	0.75866	0.124514	32
1	235189	0.708336	0.264591	68
1	236680	0.605848	0.338521	87
1	237838	0.941914	0.249027	64
1	238042	0.274518	0.0466926	12
1	238792	0.702349	0.151751	39
1	238928	0.602402	0.077821	20
1	239657	0.897035	0.338521	87
1	239739	0.806875	0.0233463	6
1	240061	0.170475	0.354086	91
1	240180	0.452007	0.206226	53
1	240440	0.248703	0.0350195	9
1	240478	0.243909	0.0700389	18
1	241299	0.222892	0.229572	59
1	242504	0.517816	0.132296	34
1	242603	0.859421	0.0350195	9
1	242678	0.0217707	0.459144	118
1	242911	0.0570452	0.190661	49
1	243012	0.482546	0.194553	50
1	243303	0.313372	0.307393	79
1	243470	0.684193	0.206226	53
1	243574	0.684193	0.206226	53
1	243619	0.684193	0.206226	53
1	245038	0.736497	0.214008	55
1	245112	0.670595	0.198444	51
1	245435	0.992388	0.190661	49
1	245558	0.788209	0.0622568	16
1	245788	0.847567	0.377432	97
1	245871	0.600705	0.210117	54
1	246084	0.684193	0.206226	53
1	246174	0.473062	0.22179	57
1	246425	0.518621	0.319066	82
1	246561	0.0609054	0.439689	113
1	247065	0.112279	0.498054	128
1	247357	0.259734	0.490272	126
1	247484	0.24829	0.463035	119
1	247683	0.0940219	0.206226	53
1	247814	0.0835364	0.389105	100
1	247850	0.0419813	0.392996	101
1	248261	0.0789031	0.357977	92
1	248737	0.154415	0.373541	96
1	249083	0.51471	0.396887	102
1	249256	0.113516	0.392996	101
1	250096	0.0179992	0.439689	113
1	250479	0.0346132	0.400778	103
1	250624	0.0346132	0.400778	103
1	250718	0.0236006	0.400778	103
1	250934	0.0346132	0.400778	103
1	251145	0.761534	0.431907	111
1	251256	0.4351	0.451362	116
1	252095	0.122785	0.416342	107
1	252243	0.106093	0.396887	102
1	252841	0.297179	0.22179	57
1	252953	0.525775	0.0583658	15
1	252967	0.471556	0.0622568	16
1	253289	0.115333	0.424125	109
1	253378	0.263937	0.0350195	9
1	253940	0.584646	0.233463	60
1	254004	0.182413	0.420233	108
1	254311	0.316143	0.0389105	10
1	254380	0.907604	0.0389105	10
1	255333	0.517665	0.447471	115
1	255849	0.0573166	0.404669	104
1	256039	0.664307	0.431907	111
1	256194	0.0544354	0.354086	91
1	257452	0.715434	0.0194553	5
1	259953	0.0898513	0.116732	30
1	260010	0.0812364	0.217899	56
1	260496	0.106888	0.171206	44
1	261240	0.388739	0.0583658	15
1	261416	0.479324	0.0544747	14
1	261830	0.236353	0.241245	62
1	262205	0.706533	0.128405	33
1	262864	0.916767	0.077821	20
1	263787	0.476426	0.451362	116
1	263895	0.991211	0.396887	102
1	264845	0.901979	0.389105	100
1	265099	0.873318	0.392996	101
1	265611	0.0330894	0.322957	83
1	266159	0.053045	0.319066	82
1	266510	0.173168	0.0194553	5
1	266733	0.648332	0.404669	104
1	266943	0.800225	0.202335	52
1	267251	0.642657	0.404669	104
1	267352	0.746571	0.400778	103
1	267394	0.233714	0.0505837	13
1	267458	0.372893	0.0622568	16
1	267925	0.0475365	0.322957	83
1	268235	0.42867	0.077821	20
1	268853	0.0981484	0.0933852	24
1	269283	0.0715347	0.303502	78
1	269680	0.743466	0.151751	39
1	271416	0.0558436	0.392996	101
1	271873	0.146189	0.0389105	10
1	274180	0.112746	0.0311284	8
1	274842	0.112746	0.0311284	8
1	275147	0.24591	0.178988	46
1	275504	0.350054	0.494163	127
1	275624	0.06617	0.322957	83
1	276649	0.112746	0.0311284	8
1	277226	0.112746	0.0311284	8
1	277389	0.15293	0.0466926	12
1	277613	0.0674896	0.451362	116
1	277659	0.10716	0.40856	105
1	277847	0.137408	0.463035	119
1	278080	0.337698	0.0505837	13
1	278383	0.292678	0.0272374	7
1	278674	0.162629	0.0350195	9
1	279435	0.262395	0.0894942	23
1	279531	0.112746	0.0311284	8
1	280584	0.193452	0.159533	41
1	281038	0.737075	0.0661479	17
1	281312	0.737075	0.0661479	17
1	281863	0.490035	0.105058	27
1	283155	0.299683	0.233463	60
1	283751	0.112746	0.0311284	8
1	283900	0.703234	0.0856031	22
1	284444	0.899666	0.077821	20
1	284815	0.480456	0.143969	37
1	284989	0.494132	0.478599	123
1	285111	0.144658	0.48249	124
1	285729	0.129856	0.428016	110
1	287160	0.0587666	0.389105	100
1	288548	0.28341	0.474708	122
1	289260	0.503915	0.474708	122
1	289857	0.0648111	0.303502	78
1	291135	0.0333155	0.451362	116
1	291602	0.0940483	0.396887	102
1	291796	0.0692048	0.276265	71
1	291938	0.776367	0.0350195	9
1	292013	0.948972	0.229572	59
1	292239	0.434143	0.0544747	14
1	292468	0.550539	0.11284	29
1	292520	0.19438	0.373541	96
1	292581	0.815338	0.18677	48
1	292637	0.0295349	0.0700389	18
1	292671	0.180674	0.470817	121
1	293313	0.571538	0.225681	58
1	294899	0.0625795	0.287938	74
1	296724	0.140482	0.392996	101
1	296776	0.216653	0.116732	30
1	297946	0.0243207	0.463035	119
1	298086	0.201761	0.291829	75
1	302575	0.716741	0.182879	47
1	304281	0.287722	0.33463	86
1	304565	0.125821	0.466926	120
1	304984	0.723678	0.303502	78
1	305362	0.586903	0.132296	34
1	305431	0.0907688	0.470817	121
1	306240	0.499823	0.0311284	8
1	306663	0.832248	0.124514	32
1	306874	0.499823	0.0311284	8
1	307266	0.863936	0.151751	39
1	307847	0.127572	0.435798	112
1	308370	0.107271	0.424125	109
1	309185	0.470548	0.29572	76
1	309970	0.358094	0.385214	99
1	310925	0.381281	0.420233	108
1	311064	0.928554	0.330739	85
1	311610	0.464711	0.346304	89
1	311769	0.379408	0.194553	50
1	313381	0.0533563	0.346304	89
1	316941	0.800921	0.357977	92
1	317357	0.641886	0.0272374	7
1	317402	0.642119	0.36965	95
1	318255	0.975143	0.0155642	4
1	319963	0.98298	0.350195	90
1	320474	0.960463	0.33463	86
1	321016	0.975143	0.0155642	4
1	321057	0.977167	0.33463	86
1	321615	0.867106	0.357977	92
1	321897	0.867106	0.357977	92
1	323072	0.730164	0.0622568	16
1	327241	0.454254	0.0466926	12
1	328445	0.0659121	0.346304	89
1	331177	0.993785	0.357977	92
1	331771	0.129314	0.0389105	10
1	332266	0.628472	0.400778	103
1	333482	0.929502	0.44358	114
1	335469	0.952491	0.342412	88
1	335990	0.19708	0.365759	94
1	336311	0.532692	0.0505837	13
1	338382	0.803213	0.0622568	16
1	338744	0.647474	0.392996	101
1	339305	0.454254	0.0466926	12
1	341196	0.722812	0.354086	91
1	341924	0.630435	0.40856	105
1	342259	0.280691	0.392996	101
1	342966	0.621231	0.400778	103
1	343125	0.330332	0.167315	43
1	343449	0.304456	0.365759	94
1	344235	0.366622	0.280156	72
1	345567	0.892234	0.0505837	13
1	346038	0.46803	0.326848	84
1	348970	0.712717	0.101167	26
1	349310	0.0615392	0.330739	85
1	349489	0.178827	0.428016	110
1	349786	0.159687	0.431907	111
1	350432	0.383573	0.44358	114
1	351212	0.178827	0.428016	110
1	351393	0.248445	0.416342	107
1	351689	0.145965	0.346304	89
1	351832	0.0555318	0.466926	120
1	352602	0.144097	0.431907	111
1	352807	0.152559	0.424125	109
1	353031	0.942413	0.0428016	11
1	353230	0.144097	0.431907	111
1	353328	0.218153	0.416342	107
1	355246	0.706354	0.252918	65
1	355316	0.479098	0.0661479	17
1	355397	0.739369	0.225681	58
1	355976	0.302951	0.0661479	17
1	356907	0.29283	0.396887	102
1	356942	0.72855	0.151751	39
1	357001	0.738991	0.268482	69
1	357481	0.354013	0.0856031	22
1	359382	0.567776	0.182879	47
1	360888	0.519427	0.268482	69
1	361200	0.0757131	0.400778	103
1	362150	0.397413	0.276265	71
1	362211	0.783615	0.0972763	25
1	362763	0.0585247	0.396887	102
1	363510	0.935332	0.175097	45
1	363817	0.238911	0.143969	37
1	363886	0.446825	0.124514	32
1	367150	0.167719	0.322957	83
1	367218	0.759941	0.101167	26
1	367914	0.178715	0.29572	76
1	368476	0.733158	0.190661	49
1	370670	0.741096	0.116732	30
1	371410	0.592446	0.350195	90
1	371484	0.196085	0.494163	127
1	372172	0.825093	0.416342	107
1	372205	0.372302	0.389105	100
1	372809	0.372302	0.389105	100
1	373097	0.2176	0.377432	97
1	373685	0.440943	0.416342	107
1	375468	0.465331	0.361868	93
1	375499	0.38177	0.36965	95
1	376976	0.698466	0.0428016	11
1	377334	0.196278	0.171206	44
1	377825	0.197323	0.284047	73
1	378101	0.127164	0.284047	73
1	379604	0.236011	0.0272374	7
1	381773	0.617787	0.350195	90
1	381817	0.365327	0.439689	113
1	382112	0.121013	0.428016	110
1	383526	0.477428	0.354086	91
1	384584	0.461729	0.365759	94
1	384674	0.293192	0.428016	110
1	388705	0.352384	0.396887	102
1	389095	0.300506	0.470817	121
1	389215	0.995605	0.178988	46
1	389577	0.40284	0.361868	93
1	389853	0.432454	0.478599	123
1	389949	0.177403	0.498054	128
1	390211	0.566968	0.400778	103
1	390415	0.469814	0.44358	114
1	390542	0.712655	0.40856	105
1	390744	0.384998	0.463035	119
1	390770	0.384998	0.463035	119
1	392131	0.737962	0.431907	111
1	392316	0.342656	0.455253	117
1	392462	0.316448	0.459144	118
1	394129	0.817367	0.435798	112
1	394552	0.167931	0.29572	76
1	394881	0.67318	0.0505837	13
1	394901	0.6949	0.0389105	10
1	395368	0.771676	0.0466926	12
1	395787	0.444623	0.140078	36
1	395878	0.494174	0.435798	112
1	396021	0.151522	0.455253	117
1	396130	0.640303	0.0933852	24
1	397173	0.745013	0.077821	20
1	397698	0.401551	0.459144	118
1	398592	0.567076	0.466926	120
1	399766	0.959738	0.124514	32
1	399920	0.224789	0.0661479	17
1	400145	0.938534	0.0622568	16
1	400593	0.150564	0.428016	110
1	400701	0.34281	0.0700389	18
1	401107	0.298148	0.459144	118
1	401532	0.695386	0.424125	109
1	401762	0.486989	0.307393	79
1	401894	0.359406	0.40856	105
1	402676	0.338964	0.361868	93
1	402866	0.243616	0.0194553	5
1	404038	0.402058	0.494163	127
1	404108	0.187333	0.264591	68
1	405583	0.345893	0.14786	38
1	405740	0.543045	0.470817	121
1	407205	0.317134	0.151751	39
1	408649	0.931296	0.116732	30
1	409707	0.397014	0.451362	116
1	410187	0.880578	0.124514	32
1	410242	0.961202	0.0933852	24
1	410463	0.203986	0.311284	80
1	411663	0.433564	0.0583658	15
1	411774	0.539189	0.474708	122
1	412423	0.768699	0.474708	122
1	412683	0.876893	0.470817	121
1	413335	0.5938	0.311284	80
1	413471	0.206146	0.303502	78
1	413800	0.947668	0.48249	124
1	413817	0.206146	0.303502	78
1	413954	0.478593	0.175097	45
1	414067	0.394339	0.0583658	15
1	414212	0.222404	0.18677	48
1	414360	0.963507	0.486381	125
1	414453	0.822969	0.22179	57
1	414782	0.418076	0.494163	127
1	414962	0.570285	0.0700389	18
1	415139	0.639007	0.470817	121
1	415297	0.8164	0.0350195	9
1	415468	0.296455	0.0194553	5
1	415588	0.145533	0.0272374	7
1	416491	0.391057	0.494163	127
1	416711	0.305643	0.280156	72
1	416915	0.252183	0.478599	123
1	417004	0.449057	0.0661479	17
1	417193	0.408199	0.0505837	13
1	417318	0.251769	0.0272374	7
1	417733	0.527196	0.0389105	10
1	418434	0.431484	0.385214	99
1	418615	0.400823	0.381323	98
1	419133	0.684521	0.0817121	21
1	419950	0.52743	0.396887	102
1	419964	0.642119	0.428016	110
1	420248	0.530042	0.404669	104
1	420648	0.510554	0.412451	106
1	420866	0.596983	0.136187	35
1	421839	0.678963	0.486381	125
1	421914	0.607205	0.48249	124
1	422095	0.390512	0.416342	107
1	422239	0.473557	0.373541	96
1	422491	0.849496	0.315175	81
1	426854	0.348118	0.474708	122
1	426998	0.379212	0.291829	75
1	427069	0.393906	0.268482	69
1	427539	0.183839	0.319066	82
1	427813	0.170684	0.357977	92
1	428014	0.655328	0.241245	62
1	428839	0.126383	0.322957	83
1	429221	0.0568609	0.167315	43
1	429505	0.637349	0.346304	89
1	429703	0.0368729	0.229572	59
1	429730	0.00984706	0.303502	78
1	430076	0.154225	0.428016	110
1	430462	0.0329429	0.217899	56
1	432102	0.499154	0.256809	66
1	434306	0.138652	0.447471	115
1	434319	0.028908	0.214008	55
1	434620	0.737211	0.120623	31
1	434762	0.91305	0.245136	63
1	435313	0.0737896	0.233463	60
1	435399	0.0616527	0.22179	57
1	435420	0.834103	0.206226	53
1	435473	0.15942	0.143969	37
1	435555	0.603539	0.171206	44
1	435737	0.611127	0.237354	61
1	435815	0.593308	0.0622568	16
1	435990	0.366329	0.385214	99
1	436113	0.259354	0.474708	122
1	436331	0.219762	0.470817	121
1	436638	0.269272	0.299611	77
1	436777	0.672629	0.400778	103
1	436962	0.558159	0.459144	118
1	437174	0.882021	0.268482	69
1	437189	0.417808	0.124514	32
1	438106	0.646641	0.217899	56
1	438386	0.375574	0.22179	57
1	438541	0.977594	0.132296	34
1	438688	0.139227	0.486381	125
1	438929	0.670361	0.229572	59
1	439434	0.690175	0.171206	44
1	439785	0.558333	0.22179	57
1	440140	0.546016	0.210117	54
1	440434	0.2789	0.40856	105
1	440910	0.163058	0.128405	33
1	441699	0.473727	0.22179	57
1	441892	0.787775	0.249027	64
1	442025	0.554067	0.311284	80
1	442244	0.89438	0.280156	72
1	442271	0.330486	0.0661479	17
1	442513	0.234786	0.346304	89
1	442725	0.236979	0.346304	89
1	443412	0.614046	0.291829	75
1	443513	0.395901	0.0272374	7
1	443677	0.493727	0.361868	93
1	443853	0.790042	0.0428016	11
1	444206	0.510037	0.0428016	11
1	444250	0.395901	0.0272374	7
1	444540	0.37981	0.319066	82
1	444601	0.199754	0.0350195	9
1	444632	0.87407	0.198444	51
1	444646	0.491528	0.330739	85
1	444960	0.638961	0.319066	82
1	445079	0.395901	0.0272374	7
1	445233	0.45827	0.350195	90
1	445336	0.404768	0.07393	19
1	445370	0.404768	0.07393	19
1	445505	0.143747	0.0350195	9
1	445576	0.990173	0.202335	52
1	445797	0.814985	0.280156	72
1	446022	0.469762	0.326848	84
1	446183	0.965406	0.346304	89
1	446628	0.372947	0.0661479	17
1	446756	0.540431	0.0389105	10
1	447293	0.259564	0.357977	92
1	449510	0.688583	0.198444	51
1	449560	0.745083	0.210117	54
1	449689	0.049844	0.101167	26
1	451464	0.688583	0.198444	51
1	452718	0.80606	0.447471	115
1	453120	0.0253614	0.155642	40
1	453993	0.611022	0.455253	117
1	454505	0.301345	0.428016	110
1	454535	0.0273764	0.206226	53
1	454792	0.399876	0.182879	47
1	454953	0.160362	0.182879	47
1	454975	0.0290468	0.00389105	1
1	455765	0.449392	0.182879	47
1	455996	0.610417	0.338521	87
1	456097	0.528749	0.342412	88
1	457036	0.704715	0.0272374	7
1	457096	0.704715	0.0272374	7
1	457129	0.186844	0.0428016	11
1	457815	0.705697	0.0350195	9
1	458348	0.40043	0.0233463	6
1	459037	0.360298	0.128405	33
1	459541	0.149726	0.0894942	23
1	459880	0.704715	0.0272374	7
1	460157	0.40043	0.0233463	6
1	463226	0.892057	0.182879	47
1	465096	0.11323	0.470817	121
1	465237	0.782684	0.14786	38
1	466372	0.00279068	0.498054	128
1	467200	0.133786	0.175097	45
1	467322	0.203324	0.190661	49
1	467517	0.0899368	0.451362	116
1	469995	0.676613	0.2607	67
1	470665	0.155535	0.151751	39
1	470901	0.448877	0.311284	80
1	470978	0.647974	0.124514	32
1	471611	0.643689	0.0583658	15
1	472391	0.919222	0.284047	73
1	472498	0.418753	0.284047	73
1	472732	0.360124	0.389105	100
1	473601	0.514785	0.178988	46
1	473632	0.670232	0.077821	20
1	473759	0.657743	0.0505837	13
1	474387	0.424409	0.182879	47
1	474406	0.926304	0.155642	40
1	476225	0.550912	0.0661479	17
1	476254	0.961451	0.0622568	16
1	476544	0.927752	0.474708	122
1	477037	0.324991	0.0350195	9
1	477287	0.628561	0.338521	87
1	477309	0.810123	0.322957	83
1	477628	0.797376	0.470817	121
1	477663	0.58324	0.447471	115
1	477876	0.710943	0.459144	118
1	478552	0.540152	0.354086	91
1	478577	0.826165	0.128405	33
1	479147	0.214393	0.252918	65
1	479508	0.895745	0.40856	105
1	480303	0.849245	0.303502	78
1	480540	0.672498	0.136187	35
1	480884	0.560464	0.077821	20
1	481814	0.440338	0.225681	58
1	482966	0.775958	0.276265	71
1	483006	0.67018	0.132296	34
1	483463	0.793138	0.350195	90
1	485242	0.167108	0.478599	123
1	486440	0.112995	0.342412	88
1	487641	0.728124	0.33463	86
1	488426	0.0454999	0.463035	119
1	489664	0.80134	0.357977	92
1	489844	0.210386	0.44358	114
1	491042	0.232001	0.22179	57
1	491701	0.851768	0.171206	44
1	492528	0.614532	0.447471	115
1	494725	0.122085	0.252918	65
1	495164	0.365266	0.249027	64
1	495626	0.337285	0.0856031	22
1	495988	0.12829	0.241245	62
1	496730	0.775713	0.346304	89
1	496957	0.617189	0.249027	64
1	497166	0.656311	0.447471	115
1	497991	0.346773	0.252918	65
1	498836	0.669739	0.163424	42
1	501627	0.0625025	0.268482	69
1	502669	0.687582	0.256809	66
1	503836	0.854337	0.338521	87
1	503930	0.848746	0.315175	81
1	505029	0.790834	0.350195	90
1	505239	0.472607	0.0817121	21
1	505948	0.866679	0.132296	34
1	506716	0.38346	0.077821	20
1	506757	0.280972	0.0583658	15
1	507419	0.664636	0.280156	72
1	507706	0.417582	0.40856	105
1	514658	0.109632	0.0466926	12
1	514679	0.152746	0.105058	27
1	514894	0.696131	0.194553	50
1	515126	0.626457	0.0972763	25
1	516438	0.484949	0.280156	72
1	516613	0.444965	0.373541	96
1	516944	0.703736	0.252918	65
1	517553	0.69175	0.198444	51
1	518652	0.65165	0.48249	124
1	518782	0.829534	0.470817	121
1	519069	0.704566	0.392996	101
1	519222	0.130711	0.0350195	9
1	519387	0.902565	0.466926	120
1	519456	0.765532	0.494163	127
1	519471	0.694472	0.48249	124
1	519537	0.763639	0.490272	126
1	519672	0.65042	0.470817	121
1	520098	0.729405	0.466926	120
1	520313	0.597401	0.470817	121
1	520997	0.0913225	0.225681	58
1	521183	0.0344163	0.245136	63
1	521480	0.0488415	0.245136	63
1	521985	0.0035787	0.229572	59
1	522045	0.328855	0.428016	110
1	522223	0.570357	0.190661	49
1	522600	0.0201162	0.22179	57
1	525870	0.350497	0.182879	47
1	525927	0.781044	0.128405	33
1	526370	0.405363	0.198444	51
1	527208	0.732489	0.315175	81
1	527584	0.743711	0.40856	105
1	528019	0.702762	0.404669	104
1	528433	0.894561	0.365759	94
1	528715	0.709272	0.40856	105
1	529253	0.61959	0.167315	43
1	529635	0.182781	0.11284	29
1	529667	0.324848	0.101167	26
1	529908	0.592838	0.214008	55
1	530008	0.292454	0.0856031	22
1	530445	0.750189	0.420233	108
1	530553	0.967714	0.420233	108
1	530821	0.489787	0.478599	123
1	530910	0.424937	0.338521	87
1	531014	0.967714	0.420233	108
1	531179	0.682311	0.124514	32
1	531247	0.322528	0.33463	86
1	531523	0.211781	0.108949	28
1	531716	0.781044	0.128405	33
1	531836	0.502042	0.217899	56
1	531856	0.745543	0.40856	105
1	532048	0.485994	0.424125	109
1	532225	0.81942	0.11284	29
1	532428	0.596665	0.124514	32
1	532586	0.596665	0.124514	32
1	533517	0.652329	0.198444	51
1	534195	0.704596	0.18677	48
1	534357	0.48733	0.128405	33
1	534432	0.165067	0.136187	35
1	534798	0.834556	0.424125	109
1	534863	0.834556	0.424125	109
1	535460	0.834556	0.424125	109
1	536564	0.539891	0.424125	109
1	538503	0.487782	0.373541	96
1	539103	0.475847	0.373541	96
1	539464	0.742661	0.0311284	8
1	539658	0.487782	0.373541	96
1	539733	0.578652	0.36965	95
1	540058	0.824613	0.396887	102
1	541751	0.597261	0.299611	77
1	543148	0.804773	0.357977	92
1	544068	0.77316	0.105058	27
1	544813	0.931296	0.22179	57
1	545171	0.969559	0.338521	87
1	545770	0.342623	0.0894942	23
1	545856	0.477759	0.29572	76
1	547263	0.341314	0.163424	42
1	548319	0.626501	0.350195	90
1	548483	0.577813	0.474708	122
1	548499	0.664459	0.466926	120
1	548999	0.213164	0.167315	43
1	551983	0.7636	0.077821	20
1	552777	0.528089	0.361868	93
1	552796	0.318475	0.178988	46
1	552933	0.304435	0.357977	92
1	552985	0.355551	0.365759	94
1	553285	0.716024	0.311284	80
1	553789	0.973272	0.361868	93
1	553991	0.694871	0.241245	62
1	554693	0.801014	0.171206	44
1	555109	0.430606	0.431907	111
1	555609	0.454437	0.0428016	11
1	557507	0.822075	0.105058	27
1	557564	0.315808	0.105058	27
1	557774	0.764989	0.330739	85
1	558220	0.439619	0.338521	87
1	558379	0.864984	0.140078	36
1	561585	0.13763	0.0583658	15
1	562011	0.909488	0.0622568	16
1	562625	0.806875	0.346304	89
1	562761	0.864984	0.307393	79
1	562975	0.779542	0.108949	28
1	564476	0.745225	0.151751	39
1	565080	0.35925	0.280156	72
1	565302	0.787558	0.241245	62
1	566941	0.172813	0.385214	99
1	567457	0.424266	0.392996	101
1	568429	0.493182	0.175097	45
1	568766	0.679957	0.354086	91
1	568924	0.920298	0.307393	79
1	569727	0.0598214	0.214008	55
1	569745	0.0314099	0.108949	28
1	569781	0.0242865	0.182879	47
1	570322	0.594883	0.18677	48
1	571205	1	0.361868	93
1	572053	0.288626	0.264591	68
1	572161	0.606135	0.268482	69
1	572328	0.449608	0.322957	83
1	572586	0.743116	0.225681	58
1	572643	0.891704	0.490272	126
1	572773	0.789255	0.272374	70
1	573738	0.670232	0.0856031	22
1	574162	0.675684	0.385214	99
1	575678	0.853626	0.229572	59
1	577323	0.311601	0.474708	122
1	577493	0.178014	0.233463	60
1	577897	0.0724112	0.0233463	6
1	578991	0.309908	0.233463	60
1	579884	0.0435993	0.167315	43
1	580914	0.0601103	0.206226	53
1	581414	0.359605	0.315175	81
1	581476	0.348441	0.44358	114
1	581634	0.0523374	0.101167	26
1	581969	0.471323	0.2607	67
1	582136	0.708819	0.455253	117
1	582166	0.834046	0.44358	114
1	583573	0.291588	0.319066	82
1	584008	0.300983	0.319066	82
1	584156	0.139056	0.420233	108
1	584213	0.831747	0.256809	66
1	585048	0.492403	0.237354	61
1	585995	0.164678	0.198444	51
1	586205	0.842764	0.241245	62
1	586899	0.233034	0.447471	115
1	586941	0.177903	0.249027	64
1	587094	0.104424	0.264591	68
1	587232	0.789823	0.357977	92
1	588464	0.581878	0.225681	58
1	589142	0.555977	0.229572	59
1	589688	0.611273	0.490272	126
1	590536	0.406133	0.256809	66
1	590666	0.346172	0.171206	44
1	590903	0.953724	0.159533	41
1	591584	0.396388	0.163424	42
1	592597	0.101756	0.105058	27
1	592867	0.0771411	0.151751	39
1	592984	0.464585	0.163424	42
1	593706	0.524222	0.0972763	25
1	593807	0.785277	0.0583658	15
1	593981	0.555287	0.140078	36
1	594036	0.890217	0.077821	20
1	594051	0.00584119	0.346304	89
1	594166	0.633316	0.194553	50
1	594258	0.482035	0.435798	112
1	594446	0.931576	0.178988	46
1	594718	0.0187671	0.33463	86
1	596257	0.013275	0.342412	88
1	596314	0.0164335	0.338521	87
1	596487	0.0286572	0.381323	98
1	597037	0.0887026	0.22179	57
1	597076	0.643383	0.14786	38
1	597319	0.0439483	0.48249	124
1	597595	0.278325	0.252918	65
1	597988	0.237232	0.40856	105
1	598774	0.229231	0.48249	124
1	599420	0.632007	0.0583658	15
1	599461	0.60593	0.33463	86
1	599650	0.94012	0.178988	46
1	599730	0.81559	0.202335	52
1	600201	0.10879	0.252918	65
1	600306	0.797239	0.0933852	24
1	600902	0.930462	0.120623	31
1	602162	0.995605	0.163424	42
1	603851	0.928554	0.420233	108
1	603880	0.587748	0.439689	113
1	603998	0.110949	0.428016	110
1	604028	0.699395	0.420233	108
1	604589	0.0813655	0.0466926	12
1	604664	0.707283	0.167315	43
1	604849	0.158617	0.0894942	23
1	605032	0.34491	0.0583658	15
1	605176	0.921145	0.455253	117
1	605713	0.557968	0.225681	58
1	606019	0.55508	0.466926	120
1	606267	0.183869	0.392996	101
1	606437	0.731856	0.171206	44
1	606579	0.701527	0.311284	80
1	606634	0.442005	0.217899	56
1	606705	0.150108	0.396887	102
1	606764	0.0337601	0.29572	76
1	607355	0.103247	0.338521	87
1	607398	0.100225	0.22179	57
1	607559	0.850186	0.435798	112
1	607706	0.596228	0.451362	116
1	607865	0.0155447	0.361868	93
1	608068	0.192285	0.466926	120
1	608512	0.08863	0.385214	99
1	608689	0.132691	0.412451	106
1	608889	0.219693	0.463035	119
1	609094	0.105606	0.435798	112
1	609311	0.112881	0.389105	100
1	609446	0.0863502	0.392996	101
1	610223	0.0717062	0.124514	32
1	611089	0.217262	0.478599	123
1	612952	0.00893316	0.330739	85
1	613195	0.601008	0.0856031	22
1	614273	0.203779	0.486381	125
1	614977	0.0476931	0.361868	93
1	615209	0.962723	0.151751	39
1	616458	0.723197	0.0389105	10
1	616831	0.121423	0.365759	94
1	617071	0.196646	0.381323	98
1	617402	0.0678208	0.498054	128
1	617873	0.869554	0.108949	28
1	619000	0.895836	0.140078	36
1	621036	0.924885	0.171206	44
1	621591	0.350965	0.400778	103
1	622561	0.828604	0.136187	35
1	624529	0.705697	0.287938	74
1	624775	0.683646	0.175097	45
1	625204	0.980845	0.159533	41
1	625432	0.762565	0.140078	36
1	625489	0.538912	0.132296	34
1	626351	0.973636	0.486381	125
1	626542	0.8114	0.167315	43
1	626569	0.715807	0.116732	30
1	627062	0.487235	0.214008	55
1	627925	0.48217	0.22179	57
1	628630	0.554874	0.229572	59
1	628685	0.393601	0.0933852	24
1	628866	0.356687	0.233463	60
1	628954	0.397463	0.225681	58
1	630209	1	0.116732	30
1	631754	0.90485	0.116732	30
1	631901	0.38899	0.40856	105
1	632372	0.836725	0.163424	42
1	632602	0.956294	0.11284	29
1	632799	0.568117	0.36965	95
1	632964	0.165663	0.233463	60
1	634228	0.613161	0.202335	52
1	634963	0.107162	0.486381	125
1	635670	0.644866	0.268482	69
1	635902	0.760319	0.128405	33
1	636788	0.520206	0.190661	49
1	638653	0.123567	0.435798	112
1	642762	0.971525	0.214008	55
1	643447	0.55381	0.252918	65
1	643836	0.843363	0.29572	76
1	644148	0.141719	0.136187	35
1	644814	0.946037	0.128405	33
1	644974	0.239874	0.346304	89
1	645661	0.0258462	0.0544747	14
1	646492	0.215067	0.2607	67
1	646531	0.196954	0.264591	68
1	646558	0.0952158	0.478599	123
1	648156	0.258655	0.451362	116
1	648705	0.521017	0.252918	65
1	648863	0.854078	0.132296	34
1	649160	0.659331	0.0544747	14
1	650324	0.283138	0.077821	20
1	652281	0.188684	0.466926	120
1	652305	0.172719	0.412451	106
1	652684	0.439063	0.101167	26
1	654412	0.0687898	0.202335	52
1	654548	0.157464	0.33463	86
1	655770	0.469672	0.206226	53
1	656193	0.649746	0.140078	36
1	657898	0.339507	0.136187	35
1	658051	0.581765	0.14786	38
1	658067	0.805201	0.291829	75
1	658413	0.995605	0.350195	90
1	660534	0.513841	0.311284	80
1	660755	0.212635	0.120623	31
1	662928	0.81224	0.451362	116
1	663182	0.759903	0.474708	122
1	663474	0.328243	0.2607	67
1	663522	0.578074	0.0894942	23
1	663822	0.313847	0.377432	97
1	663874	0.415233	0.354086	91
1	664107	0.388025	0.377432	97
1	665064	0.819368	0.206226	53
1	666092	0.584665	0.155642	40
1	666158	0.305261	0.486381	125
1	666602	0.0377104	0.128405	33
1	669462	0.773442	0.077821	20
1	670382	0.546601	0.077821	20
1	670446	0.695472	0.178988	46
1	671911	0.447123	0.447471	115
1	672454	0.256358	0.451362	116
1	673785	0.769172	0.400778	103
1	674586	0.227547	0.431907	111
1	674820	0.94208	0.105058	27
1	675578	0.628117	0.416342	107
1	676195	0.58908	0.291829	75
1	677095	0.506763	0.105058	27
1	677970	0.739747	0.439689	113
1	678264	0.46267	0.124514	32
1	678747	0.824028	0.350195	90
1	678934	0.734771	0.428016	110
1	679076	0.0772576	0.396887	102
1	680574	0.405691	0.143969	37
1	680825	0.519275	0.116732	30
1	681286	0.354607	0.202335	52
1	681554	0.219218	0.229572	59
1	681653	0.87876	0.252918	65
1	681710	0.695472	0.264591	68
1	683022	0.698003	0.0700389	18
1	683186	0.259858	0.237354	61
1	683540	0.603621	0.132296	34
1	683922	0.123848	0.280156	72
1	684357	0.33226	0.194553	50
1	684772	0.33226	0.194553	50
1	684939	0.393857	0.0894942	23
1	685381	0.114381	0.287938	74
1	685486	0.162713	0.194553	50
1	685533	0.85006	0.167315	43
1	685874	0.163491	0.29572	76
1	687977	0.139682	0.412451	106
1	689553	0.0327343	0.381323	98
1	690277	0.311273	0.2607	67
1	690361	0.667419	0.249027	64
1	691127	0.59145	0.268482	69
1	691401	0.588732	0.354086	91
1	691775	0.203227	0.29572	76
1	691899	0.245118	0.155642	40
1	696278	0.633973	0.241245	62
1	696296	0.31158	0.167315	43
1	697378	0.991211	0.198444	51
1	698953	0.845602	0.463035	119
1	701107	0.939959	0.268482	69
1	701961	0.96654	0.225681	58
1	703755	0.147054	0.29572	76
1	704109	0.416181	0.256809	66
1	704212	0.161597	0.322957	83
1	706549	0.377179	0.198444	51
1	706920	0.297286	0.272374	70
1	707771	0.129519	0.198444	51
1	708523	0.87087	0.214008	55
1	709358	0.316849	0.116732	30
1	709643	0.0961609	0.322957	83
1	710166	0.93623	0.291829	75
1	710467	0.562875	0.303502	78
1	710497	0.857484	0.252918	65
1	711699	0.731623	0.237354	61
1	711812	0.115885	0.291829	75
1	712096	0.395297	0.299611	77
1	712618	0.27593	0.303502	78
1	713682	0.321961	0.0311284	8
1	714063	0.368487	0.116732	30
1	716805	0.0738356	0.0311284	8
1	719774	0.203017	0.214008	55
1	723966	0.108734	0.284047	73
1	724674	0.0733866	0.0272374	7
1	724844	0.274846	0.303502	78
1	725962	0.880498	0.233463	60
1	726800	0.336367	0.291829	75
1	727782	0.379586	0.14786	38
1	728191	0.841632	0.0700389	18
1	728544	0.139287	0.175097	45
1	728748	0.375693	0.07393	19
1	728973	0.197015	0.2607	67
1	729540	0.626898	0.0622568	16
1	730306	0.659904	0.124514	32
1	730485	0.564612	0.0661479	17
1	730948	0.107875	0.217899	56
1	731044	0.597879	0.0700389	18
1	731608	0.504741	0.175097	45
1	731917	0.132113	0.229572	59
1	732819	0.00832815	0.330739	85
1	732956	0.205757	0.307393	79
1	733046	0.0325808	0.354086	91
1	733728	0.740784	0.0583658	15
1	734158	0.0696301	0.233463	60
1	736996	0.251024	0.136187	35
1	737717	0.9702	0.48249	124
1	738108	0.80905	0.229572	59
1	738557	0.572669	0.319066	82
1	740949	0.222408	0.132296	34
1	741800	0.598998	0.268482	69
1	742852	0.126288	0.128405	33
1	743178	0.336635	0.280156	72
1	744403	0.108689	0.120623	31
1	746377	0.778629	0.276265	71
1	748146	0.584094	0.431907	111
1	748253	0.584418	0.435798	112
1	748326	0.449201	0.455253	117
1	748554	0.0602264	0.241245	62
1	748635	0.19534	0.132296	34
1	748721	0.698466	0.470817	121
1	748949	0.856361	0.268482	69
1	750424	0.0867794	0.241245	62
1	750926	0.0637864	0.268482	69
1	752603	0.376163	0.136187	35
1	755399	0.10731	0.276265	71
1	755432	0.111365	0.241245	62
1	757790	0.0360864	0.233463	60
1	758192	0.779168	0.48249	124
1	758494	0.128859	0.0856031	22
1	760567	0.352308	0.0933852	24
1	760741	0.111365	0.241245	62
1	761394	0.916767	0.182879	47
1	761468	1	0.2607	67
1	762201	0.111365	0.241245	62
1	762240	0.21729	0.249027	64
1	762345	0.111365	0.241245	62
1	762698	0.438381	0.0622568	16
1	762875	0.574723	0.36965	95
1	763691	0.150573	0.272374	70
1	764702	0.136407	0.276265	71
1	765075	0.81229	0.299611	77
1	765174	0.149744	0.280156	72
1	765612	0.500923	0.284047	73
1	766776	0.0984662	0.385214	99
1	766916	0.150573	0.272374	70
1	767816	0.0716197	0.385214	99
1	767908	0.0979716	0.377432	97
1	767998	0.0643193	0.0856031	22
1	768161	0.446992	0.361868	93
1	768561	0.188985	0.252918	65
1	768664	0.0643193	0.0856031	22
1	769275	0.14312	0.249027	64
1	769972	0.0565796	0.330739	85
1	770064	0.0456865	0.466926	120
1	770082	0.033423	0.392996	101
1	770282	0.0186117	0.404669	104
1	770963	0.124223	0.287938	74
1	771817	0.155952	0.330739	85
1	772013	0.993785	0.29572	76
1	772303	0.119444	0.326848	84
1	772458	0.841691	0.245136	63
1	772724	0.230205	0.357977	92
1	774097	0.944628	0.120623	31
1	775070	0.745225	0.077821	20
1	775518	0.111355	0.40856	105
1	775649	0.116596	0.361868	93
1	775705	0.170475	0.373541	96
1	776241	0.890652	0.214008	55
1	777251	0.365965	0.0622568	16
1	777713	0.96654	0.136187	35
1	778724	0.0451866	0.396887	102
1	779047	0.498089	0.33463	86
1	779397	0.661004	0.229572	59
1	779812	0.858349	0.120623	31
1	780337	0.654594	0.120623	31
1	780505	0.910339	0.0894942	23
1	783499	0.251714	0.377432	97
1	784254	0.095107	0.0700389	18
1	784382	0.0406664	0.299611	77
1	784491	0.144644	0.326848	84
1	785691	0.269942	0.225681	58
1	785829	0.0228242	0.268482	69
1	786874	0.146843	0.48249	124
1	787215	0.0295053	0.428016	110
1	787587	0.488782	0.416342	107
1	787697	0.128069	0.264591	68
1	788873	0.319115	0.338521	87
1	788988	0.131013	0.396887	102
1	789353	0.529221	0.373541	96
1	790787	0.528089	0.268482	69
1	790940	0.225093	0.0933852	24
1	791192	0.373476	0.105058	27
1	791439	0.796784	0.245136	63
1	793587	0.621621	0.338521	87
1	793805	0.45858	0.237354	61
1	794699	0.600766	0.33463	86
1	796471	0.936989	0.245136	63
1	797197	0.909594	0.237354	61
1	797241	0.833651	0.116732	30
1	798673	0.289176	0.447471	115
1	802259	0.953724	0.14786	38
1	802319	0.609356	0.0272374	7
1	802842	0.0460198	0.229572	59
1	803631	0.983557	0.132296	34
1	803836	0.880897	0.284047	73
1	804120	0.785234	0.178988	46
1	804969	0.674099	0.303502	78
1	806148	0.973636	0.299611	77
1	807194	0.432431	0.466926	120
1	807780	0.923492	0.190661	49
1	808732	0.162921	0.29572	76
1	808962	0.901395	0.299611	77
1	809178	0.775632	0.303502	78
1	811369	0.449836	0.291829	75
1	811781	0.662739	0.276265	71
1	812120	0.41695	0.48249	124
1	812218	0.178639	0.280156	72
1	812466	0.835865	0.132296	34
1	812574	0.678106	0.291829	75
1	812774	0.738647	0.249027	64
1	813001	0.906166	0.233463	60
1	813018	0.777762	0.0311284	8
1	813208	0.700648	0.256809	66
1	814751	0.0746412	0.346304	89
1	815910	0.568135	0.287938	74
1	818004	0.630771	0.182879	47
1	818082	0.0982758	0.29572	76
1	818672	0.568135	0.287938	74
1	820523	0.773684	0.0583658	15
1	821282	0.363546	0.287938	74
1	821772	0.440222	0.287938	74
1	822975	0.232633	0.0856031	22
1	823044	0.225569	0.217899	56
1	824906	0.920178	0.14786	38
1	828405	0.647855	0.0700389	18
1	828756	0.525184	0.276265	71
1	830155	0.161031	0.303502	78
1	831063	0.436747	0.252918	65
1	834106	0.273525	0.11284	29
1	836373	0.25429	0.357977	92
1	840039	0.986103	0.420233	108
1	842558	0.525184	0.276265	71
1	843072	0.525184	0.276265	71
1	843196	0.0557605	0.431907	111
1	844884	0.419713	0.381323	98
1	846217	0.3787	0.431907	111
1	846926	0.165249	0.182879	47
1	847477	0.291601	0.194553	50
1	848013	0.908437	0.132296	34
1	848167	0.928959	0.108949	28
1	848221	0.880737	0.11284	29
1	849254	0.812885	0.0817121	21
1	849816	0.523247	0.101167	26
1	850386	0.57785	0.284047	73
1	850505	0.922868	0.252918	65
1	850725	0.762871	0.0661479	17
1	850785	0.70522	0.272374	70
1	851288	0.830085	0.0622568	16
1	851390	0.786178	0.0389105	10
1	851927	0.931999	0.280156	72
1	853481	0.989235	0.280156	72
1	854790	0.458073	0.315175	81
1	856282	0.727306	0.342412	88
1	856738	0.755306	0.237354	61
1	857785	0.253492	0.29572	76
1	857834	0.558821	0.225681	58
1	858592	0.505278	0.214008	55
1	860972	0.783191	0.416342	107
1	861283	0.571593	0.392996	101
1	861474	0.478912	0.400778	103
1	861547	0.347796	0.396887	102
1	861643	0.799809	0.373541	96
1	861980	0.882668	0.389105	100
1	862189	0.959738	0.326848	84
1	862296	0.803968	0.36965	95
1	862404	0.712195	0.381323	98
1	862569	0.914048	0.326848	84
1	863140	0.890565	0.303502	78
1	863251	0.983557	0.330739	85
1	863498	0.393188	0.0622568	16
1	863771	0.755158	0.396887	102
1	863823	0.978473	0.455253	117
1	864335	0.909594	0.40856	105
1	864827	0.355398	0.315175	81
1	864933	0.82638	0.0661479	17
1	866197	0.119742	0.07393	19
1	866355	1	0.0505837	13
1	867494	0.103278	0.29572	76
1	868888	0.0512814	0.365759	94
1	870100	0.689448	0.0544747	14
1	870310	0.190798	0.291829	75
1	871786	0.534516	0.365759	94
1	872731	0.989235	0.256809	66
1	873447	0.704833	0.322957	83
1	873731	0.446873	0.0856031	22
1	874491	0.57968	0.0894942	23
1	874797	0.380764	0.44358	114
1	874912	0.551336	0.451362	116
1	875907	0.542171	0.264591	68
1	876498	0.449249	0.0622568	16
1	876717	0.753025	0.151751	39
1	876816	0.744766	0.252918	65
1	877192	0.993785	0.0311284	8
1	877449	0.843664	0.0544747	14
1	877562	0.492153	0.361868	93
1	877840	0.161907	0.291829	75
1	878756	0.799855	0.0233463	6
1	879096	0.623471	0.0194553	5
1	879429	0.32703	0.338521	87
1	879836	0.116625	0.0894942	23
1	880587	0.448399	0.0856031	22
1	880611	0.0490183	0.0933852	24
1	881739	0.34787	0.354086	91
1	882124	0.159287	0.291829	75
1	882153	0.938534	0.0700389	18
1	882633	0.638499	0.424125	109
1	882791	0.604763	0.0389105	10
1	882892	0.262728	0.428016	110
1	884146	0.484123	0.365759	94
1	885184	0.374418	0.29572	76
1	885985	0.392786	0.361868	93
1	887158	0.457863	0.354086	91
1	890883	0.52203	0.357977	92
1	891460	0.313631	0.0544747	14
1	893077	0.199096	0.22179	57
1	893461	0.208941	0.299611	77
1	893516	0.799855	0.0233463	6
1	893865	0.708185	0.299611	77
1	894182	0.443575	0.354086	91
1	895405	0.183495	0.373541	96
1	895470	0.31655	0.365759	94
1	896325	0.947484	0.36965	95
1	896449	0.384104	0.385214	99
1	896670	0.271188	0.237354	61
1	896853	0.466958	0.381323	98
1	897317	0.504857	0.373541	96
1	897914	0.346904	0.303502	78
1	898397	0.876277	0.206226	53
1	898666	0.209476	0.0583658	15
1	899668	0.441911	0.291829	75
1	899752	0.248494	0.29572	76
1	899805	0.426249	0.175097	45
1	900371	0.336643	0.470817	121
1	900445	0.550505	0.229572	59
1	900523	0.962209	0.354086	91
1	900958	0.166034	0.105058	27
1	901328	0.908542	0.424125	109
1	902498	0.35354	0.167315	43
1	903232	0.974379	0.486381	125
1	905360	0.767325	0.136187	35
1	906224	0.265165	0.0856031	22
1	907683	0.973636	0.338521	87
1	909236	0.886378	0.264591	68
1	909637	0.693959	0.0933852	24
1	911035	0.702202	0.167315	43
1	911587	0.34577	0.0817121	21
1	911634	0.816451	0.108949	28
1	913934	0.174976	0.07393	19
1	914088	0.166971	0.0622568	16
1	914306	0.527587	0.159533	41
1	914462	0.601957	0.0661479	17
1	914551	0.0340645	0.252918	65
1	914690	0.0340645	0.252918	65
1	914800	0.208628	0.361868	93
1	915515	0.0248247	0.0350195	9
1	915644	0.439225	0.206226	53
1	915832	0.337039	0.307393	79
1	915870	0.482869	0.307393	79
1	915920	0.388864	0.424125	109
1	915982	0.166971	0.0622568	16
1	916432	0.128411	0.330739	85
1	916617	0.942917	0.338521	87
1	916833	0.0186572	0.361868	93
1	917605	0.190638	0.346304	89
1	918131	0.0219964	0.276265	71
1	918319	0.540054	0.178988	46
1	918862	0.28849	0.0428016	11
1	919213	0.959978	0.338521	87
1	919273	0.0248247	0.0350195	9
1	919309	0.0280517	0.272374	70
1	919572	0.127243	0.0311284	8
1	919781	0.435157	0.178988	46
1	920099	0.214259	0.354086	91
1	920243	0.309497	0.36965	95
1	921330	0.0194673	0.0933852	24
1	921399	0.319218	0.315175	81
1	921888	0.00765875	0.280156	72
1	922276	0.014542	0.0933852	24
1	923111	0.916537	0.451362	116
1	924182	0.856823	0.280156	72
1	924511	0.232346	0.404669	104
1	927438	0.0168657	0.463035	119
1	928624	0.0377944	0.447471	115
1	930167	0.700707	0.404669	104
1	930371	0.809245	0.241245	62
1	930705	0.341734	0.490272	126
1	930778	0.346156	0.377432	97
1	931534	0.73129	0.431907	111
1	931578	0.268545	0.194553	50
1	932489	0.705518	0.307393	79
1	932541	0.64107	0.303502	78
1	932619	0.0268389	0.459144	118
1	932929	0.648595	0.373541	96
1	933606	0.611985	0.252918	65
1	934326	0.779999	0.214008	55
1	934952	0.129976	0.0583658	15
1	935256	0.312546	0.400778	103
1	935836	0.779999	0.214008	55
1	938568	0.0950269	0.0233463	6
1	939976	0.103347	0.0700389	18
1	940912	0.78532	0.214008	55
1	940984	0.127243	0.0311284	8
1	941352	0.0549393	0.0233463	6
1	942264	0.323696	0.0194553	5
1	942634	0.195646	0.0389105	10
1	943186	0.0187353	0.128405	33
1	944214	0.30112	0.0389105	10
1	945240	0.0130417	0.0622568	16
1	945664	0.0515633	0.0661479	17
1	945833	0.88858	0.0350195	9
1	946287	0.725907	0.210117	54
1	946335	0.0253488	0.245136	63
1	947229	0.103347	0.0700389	18
1	948070	0.593465	0.284047	73
1	949023	0.117526	0.077821	20
1	949794	0.78562	0.210117	54
1	950256	0.992388	0.245136	63
1	950790	0.014642	0.0583658	15
1	953031	0.109169	0.175097	45
1	954066	0.0316321	0.07393	19
1	954852	0.507934	0.163424	42
1	954959	0.274227	0.124514	32
1	955224	0.520114	0.182879	47
1	955304	0.0314268	0.0428016	11
1	955381	0.950505	0.33463	86
1	955557	0.756121	0.210117	54
1	955835	0.50078	0.167315	43
1	956147	0.401916	0.217899	56
1	956687	0.959499	0.416342	107
1	957601	0.774129	0.0233463	6
1	960346	0.210228	0.0428016	11
1	960928	0.287594	0.412451	106
1	961985	0.376209	0.210117	54
1	962361	0.507875	0.217899	56
1	963470	0.507875	0.217899	56
1	963948	0.959262	0.389105	100
1	964190	0.57052	0.40856	105
1	965020	0.578838	0.22179	57
1	966114	0.0803179	0.14786	38
1	966686	0.507875	0.217899	56
1	966877	0.601169	0.0700389	18
1	967884	0.37439	0.346304	89
1	968752	0.289254	0.217899	56
1	970896	0.914048	0.373541	96
1	974972	0.402585	0.206226	53
1	976433	0.0882762	0.159533	41
1	977558	1	0.400778	103
1	978363	0.555339	0.268482	69
1	978778	0.82082	0.276265	71
1	979045	0.815288	0.077821	20
1	980478	0.612362	0.455253	117
1	981899	0.428737	0.202335	52
1	982304	0.768148	0.315175	81
1	982535	0.766387	0.22179	57
1	984479	0.470213	0.319066	82
1	991978	0.398552	0.486381	125
1	992263	0.285371	0.128405	33
1	992331	0.644324	0.490272	126
1	993355	0.391164	0.48249	124
1	993375	0.790482	0.280156	72
1	994290	0.108139	0.439689	113
1	994306	0.831302	0.18677	48
1	1002697	0.979389	0.342412	88
1	1003330	0.769133	0.311284	80
1	1003922	0.385179	0.490272	126
1	1005568	0.176963	0.210117	54
1	1005875	0.482492	0.210117	54
1	1007232	0.269568	0.190661	49
1	1007560	0.445639	0.202335	52
1	1007817	0.391788	0.182879	47
1	1007953	0.50197	0.198444	51
1	1008068	0.0315679	0.0116732	3
1	1008284	0.641466	0.396887	102
1	1010158	0.440292	0.198444	51
1	1010355	0.79057	0.210117	54
1	1011718	0.338693	0.233463	60
1	1011865	0.424343	0.202335	52
1	1012709	0.39607	0.194553	50
1	1013174	0.543475	0.210117	54
1	1013742	0.0688588	0.120623	31
1	1013851	0.0194078	0.0972763	25
1	1019210	0.666625	0.0505837	13
1	1020289	0.361935	0.342412	88
1	1021294	0.324313	0.338521	87
1	1021788	0.418646	0.171206	44
1	1022076	0.414564	0.178988	46
1	1022708	0.213213	0.163424	42
1	1026695	0.362915	0.0894942	23
1	1027055	0.611524	0.365759	94
1	1027914	0.488179	0.206226	53
1	1028632	0.392297	0.276265	71
1	1029165	0.0186155	0.291829	75
1	1029211	0.552425	0.202335	52
1	1029528	0.0176404	0.420233	108
1	1030958	0.50927	0.272374	70
1	1031259	0.0181646	0.315175	81
1	1031739	0.362915	0.0894942	23
1	1031884	0.332664	0.105058	27
1	1032189	0.577776	0.159533	41
1	1032511	0.148878	0.33463	86
1	1034879	0.00620658	0.0894942	23
1	1035447	0.627939	0.11284	29
1	1035652	0.24902	0.29572	76
1	1035686	0.160215	0.280156	72
1	1035763	0.402789	0.11284	29
1	1036483	0.0705085	0.311284	80
1	1037047	0.051362	0.077821	20
1	1037212	0.362915	0.0894942	23
1	1037424	0.0587337	0.272374	70
1	1039260	0.916422	0.120623	31
1	1039285	0.164945	0.0933852	24
1	1041814	0.227408	0.0350195	9
1	1041901	0.577869	0.124514	32
1	1041934	0.508242	0.11284	29
1	1041989	0.51417	0.116732	30
1	1042196	0.253525	0.272374	70
1	1042319	0.356353	0.291829	75
1	1042359	0.483178	0.108949	28
1	1042886	0.646024	0.431907	111
1	1044349	0.409123	0.463035	119
1	1044800	0.0814948	0.385214	99
1	1045552	0.197991	0.0817121	21
1	1045981	0.799947	0.241245	62
1	1046041	0.523402	0.36965	95
1	1046741	0.910232	0.217899	56
1	1047153	0.960463	0.214008	55
1	1047306	0.827082	0.14786	38
1	1047611	0.725453	0.07393	19
1	1047733	0.407288	0.108949	28
1	1048377	0.393542	0.311284	80
1	1052021	0.392189	0.350195	90
1	1052354	0.664205	0.124514	32
1	1052968	0.346805	0.256809	66
1	1054725	0.528529	0.128405	33
1	1055617	0.435877	0.132296	34
1	1055657	0.311024	0.159533	41
1	1056228	0.33598	0.361868	93
1	1058087	0.435877	0.132296	34
1	1058109	0.526789	0.287938	74
1	1058687	0.311024	0.159533	41
1	1060088	0.664205	0.124514	32
1	1060585	0.401217	0.280156	72
1	1060782	0.19408	0.0311284	8
1	1063296	0.613203	0.14786	38
1	1064460	0.57287	0.132296	34
1	1066843	0.943085	0.175097	45
1	1067878	0.402443	0.268482	69
1	1068044	0.338972	0.14786	38
1	1070461	0.762565	0.431907	111
1	1072807	0.968623	0.155642	40
1	1073087	0.0568446	0.14786	38
1	1073161	0.444458	0.163424	42
1	1073660	0.273972	0.11284	29
1	1073777	0.210662	0.116732	30
1	1074135	0.338836	0.229572	59
1	1074380	0.166544	0.120623	31
1	1074845	0.29204	0.124514	32
1	1076306	0.589409	0.0544747	14
1	1076505	0.103476	0.404669	104
1	1076923	0.589409	0.0544747	14
1	1077510	0.535078	0.0583658	15
1	1077730	0.469775	0.206226	53
1	1079162	0.589409	0.0544747	14
1	1079644	0.28798	0.307393	79
1	1082480	0.589409	0.0544747	14
1	1083513	0.375059	0.202335	52
1	1086131	0.0576765	0.381323	98
1	1086396	0.817163	0.0700389	18
1	1086729	0.505147	0.0817121	21
1	1086869	0.506646	0.0622568	16
1	1086987	0.0627632	0.44358	114
1	1087107	0.607143	0.0700389	18
1	1087364	0.543293	0.101167	26
1	1087806	0.418969	0.077821	20
1	1088031	0.808419	0.0661479	17
1	1088184	0.992388	0.105058	27
1	1088438	0.808419	0.0661479	17
1	1089125	0.33692	0.478599	123
1	1089211	0.113711	0.0583658	15
1	1089543	0.808419	0.0661479	17
1	1089705	0.0294242	0.202335	52
1	1089733	0.808419	0.0661479	17
1	1092049	0.569488	0.33463	86
1	1092198	0.808419	0.0661479	17
1	1092328	0.500037	0.0505837	13
1	1092763	0.743256	0.0700389	18
1	1092888	0.589409	0.0544747	14
1	1093364	0.321752	0.474708	122
1	1093393	0.808419	0.0661479	17
1	1093567	0.808419	0.0661479	17
1	1093947	0.808419	0.0661479	17
1	1094069	0.990173	0.0661479	17
1	1094760	0.808419	0.0661479	17
1	1094873	0.808419	0.0661479	17
1	1095001	0.102986	0.198444	51
1	1095332	0.761534	0.0933852	24
1	1095491	0.120332	0.217899	56
1	1096128	0.810761	0.0700389	18
1	1096656	0.294496	0.101167	26
1	1097198	0.908646	0.0700389	18
1	1097383	0.529332	0.466926	120
1	1097759	0.847073	0.0622568	16
1	1097924	0.898154	0.108949	28
1	1098053	0.847073	0.0622568	16
1	1098582	0.489594	0.143969	37
1	1098653	0.14275	0.0544747	14
1	1098825	0.919699	0.0583658	15
1	1098890	0.902467	0.0933852	24
1	1099063	0.847073	0.0622568	16
1	1099222	0.798061	0.44358	114
1	1099501	0.951092	0.077821	20
1	1100305	0.847073	0.0622568	16
1	1100410	0.204439	0.0583658	15
1	1101787	0.653057	0.0661479	17
1	1102314	0.43852	0.303502	78
1	1102330	0.5425	0.326848	84
1	1104931	0.83292	0.0544747	14
1	1105105	0.96022	0.326848	84
1	1105667	0.539108	0.494163	127
1	1107008	0.756269	0.198444	51
1	1108465	0.719252	0.0894942	23
1	1112015	0.374702	0.0894942	23
1	1112521	0.423225	0.0894942	23
1	1112748	0.465864	0.0894942	23
1	1112947	0.449296	0.0894942	23
1	1113058	0.324087	0.0856031	22
1	1113354	0.336051	0.0894942	23
1	1113685	0.324087	0.0856031	22
1	1114128	0.501769	0.0933852	24
1	1114803	0.382439	0.101167	26
1	1115524	0.851832	0.0894942	23
1	1115603	0.538896	0.0856031	22
1	1116814	0.302284	0.0972763	25
1	1117302	0.0158982	0.0583658	15
1	1117760	0.53196	0.120623	31
1	1119000	0.355739	0.0933852	24
1	1119640	0.349871	0.151751	39
1	1119887	0.732422	0.167315	43
1	1120669	0.978029	0.478599	123
1	1121361	0.480843	0.463035	119
1	1122091	0.271307	0.0972763	25
1	1122382	0.163462	0.0894942	23
1	1122479	0.421078	0.0933852	24
1	1122728	0.990173	0.077821	20
1	1123201	0.614067	0.140078	36
1	1123730	0.559449	0.245136	63
1	1127110	0.823974	0.190661	49
1	1127198	0.181287	0.11284	29
1	1127326	0.864006	0.136187	35
1	1127445	0.87109	0.229572	59
1	1127817	1	0.151751	39
1	1128822	0.134558	0.0544747	14
1	1129110	0.0784004	0.0700389	18
1	1129296	0.115626	0.163424	42
1	1129780	0.617873	0.163424	42
1	1129980	0.498259	0.178988	46
1	1130203	0.767442	0.307393	79
1	1130354	0.856757	0.206226	53
1	1130452	0.550031	0.229572	59
1	1131273	0.225698	0.494163	127
1	1131456	0.422809	0.11284	29
1	1131884	0.993785	0.217899	56
1	1132213	0.612761	0.474708	122
1	1133745	0.26046	0.435798	112
1	1134230	0.0620576	0.229572	59
1	1134878	0.180363	0.22179	57
1	1134950	0.846091	0.151751	39
1	1136982	0.793406	0.0894942	23
1	1138342	0.350781	0.44358	114
1	1140450	0.488439	0.217899	56
1	1140623	0.79502	0.143969	37
1	1140683	0.158409	0.381323	98
1	1140796	0.115494	0.431907	111
1	1140934	0.498032	0.101167	26
1	1143993	0.205356	0.120623	31
1	1144293	0.990173	0.124514	32
1	1144388	1	0.120623	31
1	1144431	0.327769	0.128405	33
1	1144622	0.478288	0.400778	103
1	1144736	0.913936	0.299611	77
1	1145010	0.598498	0.346304	89
1	1145607	0.0801373	0.0389105	10
1	1145710	0.0132552	0.0700389	18
1	1146527	0.662764	0.132296	34
1	1147714	0.949351	0.494163	127
1	1147966	0.840626	0.498054	128
1	1148080	0.524594	0.175097	45
1	1148101	0.875817	0.486381	125
1	1148968	0.769015	0.182879	47
1	1149321	0.564523	0.400778	103
1	1149383	0.759941	0.0622568	16
1	1149753	0.992388	0.396887	102
1	1151008	0.2058	0.07393	19
1	1151964	0.921267	0.116732	30
1	1152293	0.475677	0.0544747	14
1	1152586	0.507362	0.0856031	22
1	1153177	0.915283	0.424125	109
1	1154106	0.620604	0.214008	55
1	1154300	0.454413	0.338521	87
1	1154322	0.873468	0.486381	125
1	1154492	0.493238	0.0972763	25
1	1154544	0.980845	0.486381	125
1	1154814	0.123358	0.0311284	8
1	1155002	0.981356	0.0933852	24
1	1155026	0.708396	0.428016	110
1	1155251	0.76203	0.07393	19
1	1155740	0.50048	0.478599	123
1	1155767	0.850691	0.490272	126
1	1155940	0.4591	0.474708	122
1	1157178	0.845663	0.36965	95
1	1158573	0.283391	0.392996	101
1	1158966	0.324268	0.22179	57
1	1159360	0.763985	0.151751	39
1	1159612	0.851451	0.357977	92
1	1159810	0.521415	0.416342	107
1	1162222	0.811302	0.346304	89
1	1162447	0.923242	0.299611	77
1	1163842	0.821551	0.280156	72
1	1164328	0.693817	0.498054	128
1	1164467	0.850564	0.190661	49
1	1166785	0.924885	0.0466926	12
1	1167335	0.741894	0.365759	94
1	1167601	0.728124	0.108949	28
1	1167844	0.638984	0.140078	36
1	1168048	0.503453	0.48249	124
1	1170764	0.33792	0.233463	60
1	1172811	0.348707	0.498054	128
1	1175988	0.713948	0.256809	66
1	1176795	0.538505	0.105058	27
1	1177048	0.884549	0.101167	26
1	1177307	0.884549	0.101167	26
1	1177348	0.952899	0.2607	67
1	1177361	0.884549	0.101167	26
1	1177680	0.884549	0.101167	26
1	1177746	0.796239	0.108949	28
1	1178349	0.245699	0.439689	113
1	1178608	0.915396	0.276265	71
1	1178984	0.271864	0.307393	79
1	1179391	0.580073	0.330739	85
1	1179444	0.918044	0.120623	31
1	1179960	0.825039	0.439689	113
1	1180026	0.958792	0.108949	28
1	1180290	0.956515	0.245136	63
1	1180352	0.684083	0.105058	27
1	1181940	0.74526	0.466926	120
1	1182098	0.516621	0.0972763	25
1	1182370	0.123358	0.0311284	8
1	1182566	0.214156	0.136187	35
1	1182624	0.602159	0.245136	63
1	1182848	0.675446	0.108949	28
1	1183042	0.309193	0.124514	32
1	1183386	0.642329	0.11284	29
1	1184139	0.0375527	0.0894942	23
1	1184249	0.852855	0.105058	27
1	1184726	0.47374	0.14786	38
1	1184827	0.668551	0.182879	47
1	1184945	0.918513	0.439689	113
1	1185596	0.675446	0.108949	28
1	1186614	0.977167	0.116732	30
1	1187501	0.916422	0.116732	30
1	1188491	0.611691	0.105058	27
1	1189375	0.431078	0.07393	19
1	1189421	0.912501	0.101167	26
1	1189617	0.773563	0.105058	27
1	1189925	0.505554	0.132296	34
1	1189992	0.129396	0.377432	97
1	1190164	0.912501	0.101167	26
1	1190703	0.258751	0.357977	92
1	1191118	0.301236	0.07393	19
1	1191656	0.912501	0.101167	26
1	1192479	0.781253	0.105058	27
1	1193082	0.814885	0.105058	27
1	1193418	0.627474	0.18677	48
1	1193672	0.792737	0.249027	64
1	1194051	0.657273	0.108949	28
1	1195238	0.880977	0.182879	47
1	1195350	0.356225	0.276265	71
1	1195542	0.899666	0.252918	65
1	1196290	0.581351	0.396887	102
1	1196478	0.178957	0.0272374	7
1	1196703	0.168589	0.0544747	14
1	1196940	0.951687	0.241245	62
1	1196986	0.348093	0.198444	51
1	1200288	0.519732	0.0583658	15
1	1201049	0.63057	0.0311284	8
1	1201396	0.670699	0.256809	66
1	1202376	0.793227	0.167315	43
1	1202502	0.218061	0.155642	40
1	1202919	0.969559	0.171206	44
1	1203027	0.874448	0.194553	50
1	1203417	0.527509	0.217899	56
1	1203627	0.877901	0.365759	94
1	1204549	0.576736	0.0544747	14
1	1204976	0.282647	0.0233463	6
1	1205599	0.256286	0.233463	60
1	1206179	0.833482	0.361868	93
1	1206633	0.317039	0.140078	36
1	1206646	0.439781	0.217899	56
1	1208826	0.255125	0.40856	105
1	1208938	0.43867	0.229572	59
1	1209662	0.109786	0.280156	72
1	1210628	0.156672	0.171206	44
1	1211281	0.0888496	0.175097	45
1	1212252	0.314294	0.0155642	4
1	1213602	0.537499	0.315175	81
1	1214221	0.565288	0.077821	20
1	1214425	0.84732	0.0428016	11
1	1215837	0.706803	0.18677	48
1	1215922	0.246669	0.280156	72
1	1216790	0.625355	0.303502	78
1	1216821	0.377086	0.249027	64
[truncated: 212,048+ more rows]
[truncated: 1 more columns]
